# Supplementary material for: Landscape of somatic single nucleotide variants and indels in colorectal cancer and impact on survival
Source: PubMed Central journal article supplement (PMC7371703; doi:10.1038/s41467-020-17386-z), 2020-07-20
Supplement: 41467_2020_17386_MOESM3_ESM.pdf [file 41467_2020_17386_MOESM3_ESM.pdf]

## **Description of Additional Supplementary Files**

File Name: Supplementary Data 1

Description: variant calls

File Name: Supplementary Data 2

Description: Survival analyses among patients with gene-level or pathwaylevel somatic mutations by hypermutation status.

File Name: Supplementary Data 3

Description: Distribution of somatic mutated genes and pathways by tumor site, adjusted for MSI status and mutation burden.

File Name: Supplementary Data 4

Description: Distribution of somatic mutated genes and pathways by tumor stage, adjusted for MSI status and mutation burden.

File Name: Supplementary Data 5

Description: Distribution of somatic mutated genes and pathways by sex, adjusted for MSI status and mutation burden.

File Name: Supplementary Data 6

Description: Clinical Attributes.
